# Supplementary material for: Signalome-wide RNAi screen identifies GBA1 as a positive mediator of autophagic cell death
Source: PubMed Central journal article supplement — Cell Death Differ. 2017 Jun 2;24(7):1288–302. doi: 10.1038/cdd.2017.80 (PMC5520177; doi:10.1038/cdd.2017.80), 2017-06-02

**a**

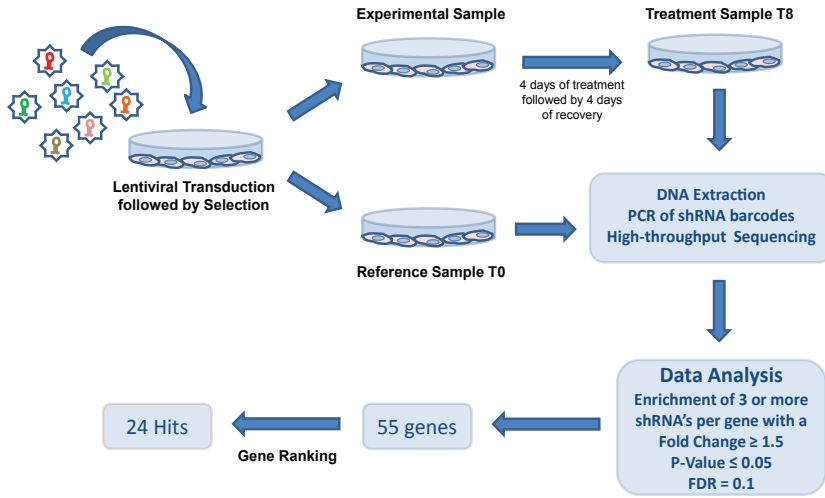

**b**

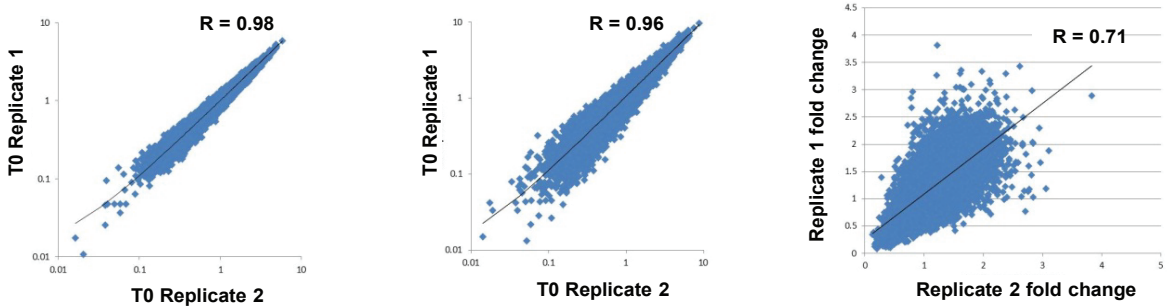

**c**

| Sl. No | Category  | GO Term                                                 | No. of genes | P        |
|--------|-----------|---------------------------------------------------------|--------------|----------|
| 1      | GOTERM_BP | Small molecule metabolic process                        | 12           | 2.30E-05 |
| 2      | GOTERM_BP | B-cell differentiation                                  | 4            | 4.80E-03 |
| 3      | GOTERM_BP | Mitotic cell cycle                                      | 4            | 2.00E-02 |
| 4      | GOTERM_BP | Negative regulation of glucuronosyltransferase activity | 2            | 2.00E-02 |
| 5      | GOTERM_BP | Negative regulation of fatty acid metabolic process     | 2            | 2.30E-02 |

  

| Sl. No | Category     | GO Term                 | No. of genes | P        |
|--------|--------------|-------------------------|--------------|----------|
| 1      | KEGG-Pathway | Metabolic Pathways      | 8            | 5.60E-10 |
| 2      | KEGG-Pathway | Viral carcinogenesis    | 5            | 2.80E-08 |
| 3      | KEGG-Pathway | Pathways in cancer      | 4            | 4.50E-05 |
| 4      | KEGG-Pathway | Lysosome                | 3            | 9.50E-05 |
| 5      | KEGG-Pathway | Chemical carcinogenesis | 3            | 1.00E-04 |

**d**

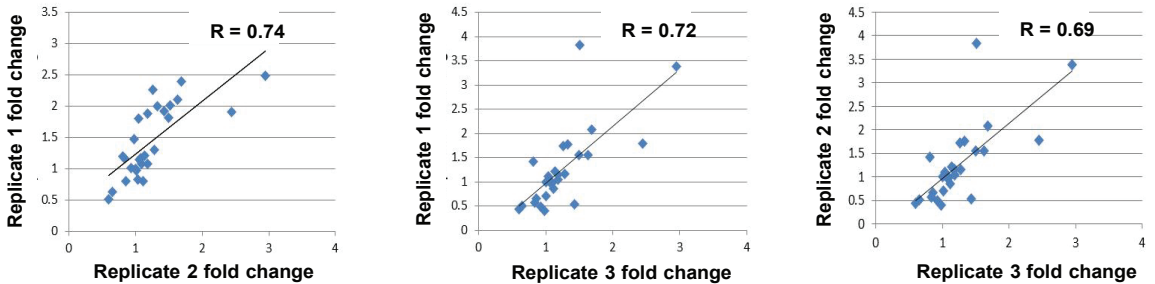

Supplement: cdd201780x5.pdf [file cdd201780x5.pdf]
