# Supplementary figures and images for: Signalome-wide RNAi screen identifies GBA1 as a positive mediator of autophagic cell death
Source: PubMed Central journal article supplement — Cell Death Differ. 2017 Jun 2;24(7):1288–302. doi: 10.1038/cdd.2017.80 (PMC5520177; doi:10.1038/cdd.2017.80), 2017-06-02

a

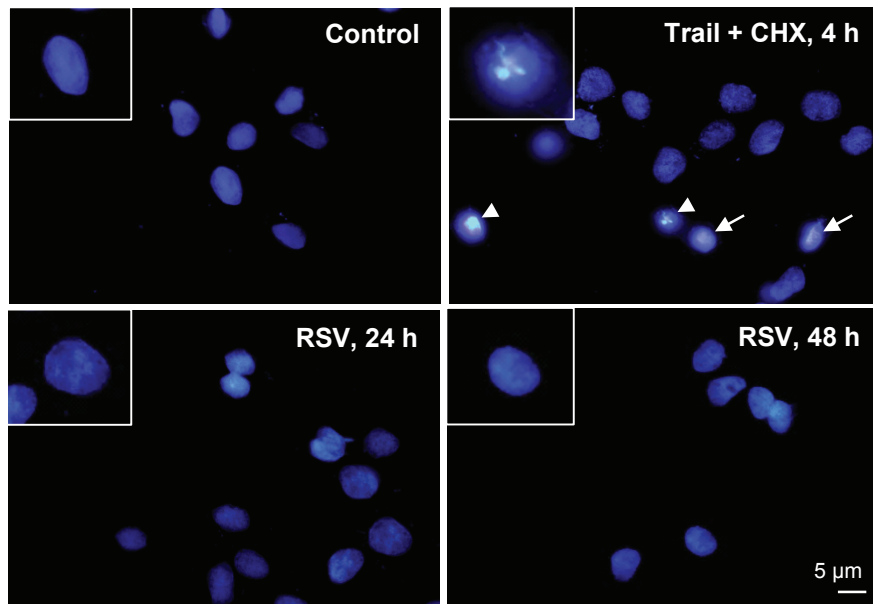

b

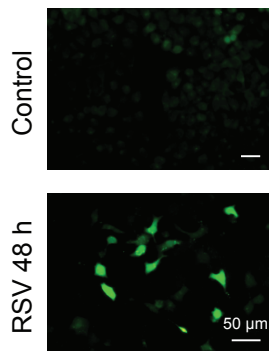

c

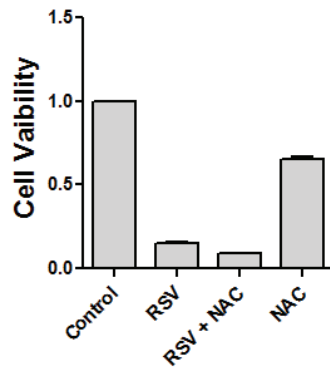

Supplement: cdd201780x2.pdf [file cdd201780x2.pdf]

a

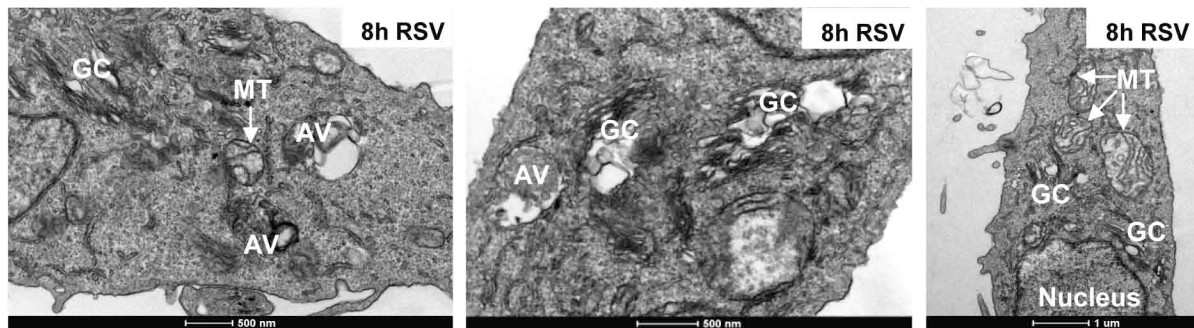

b

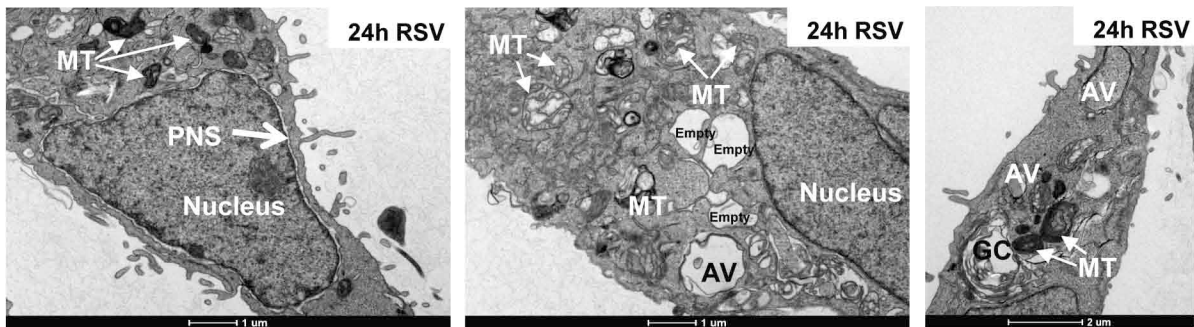

c

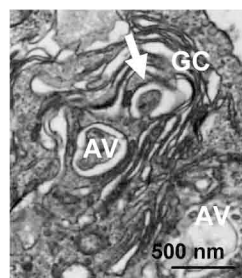

d

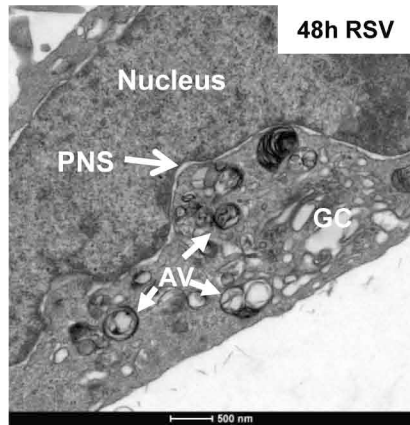

Supplement: cdd201780x3.pdf [file cdd201780x3.pdf]

a

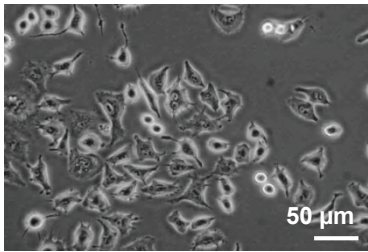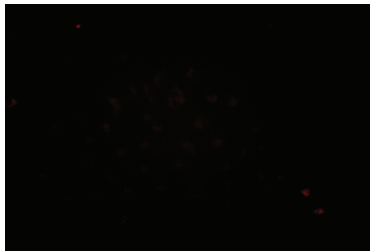

b

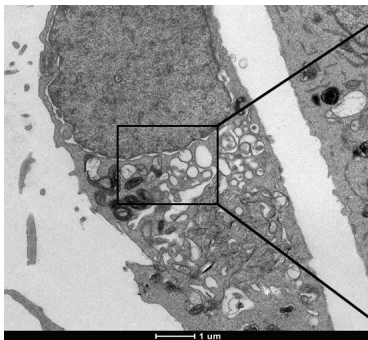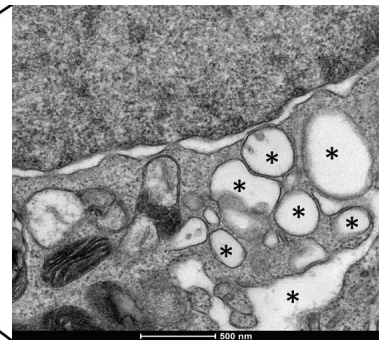

c

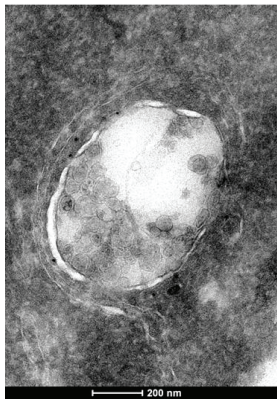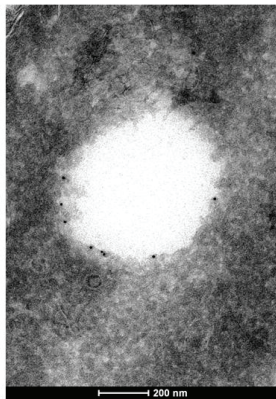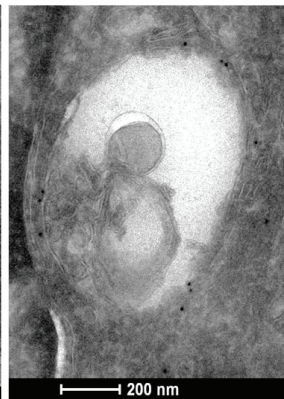

d

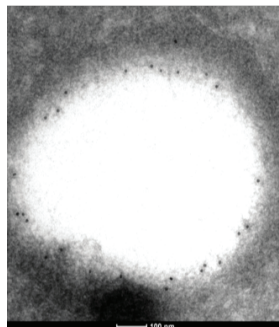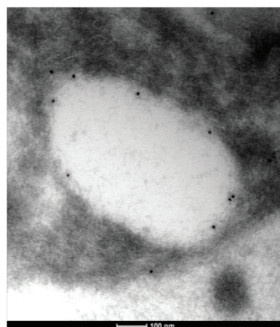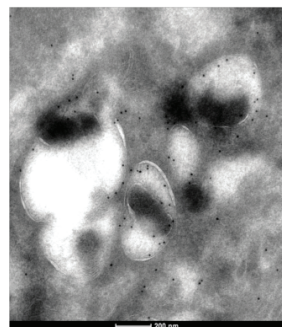

Supplement: cdd201780x4.pdf [file cdd201780x4.pdf]

a

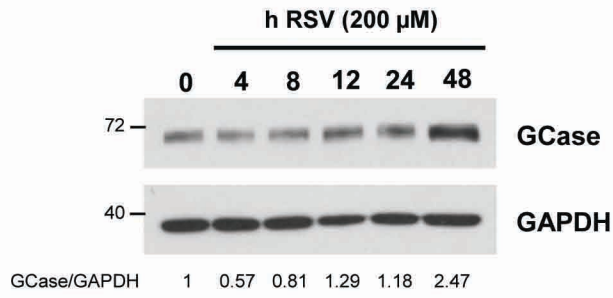

b

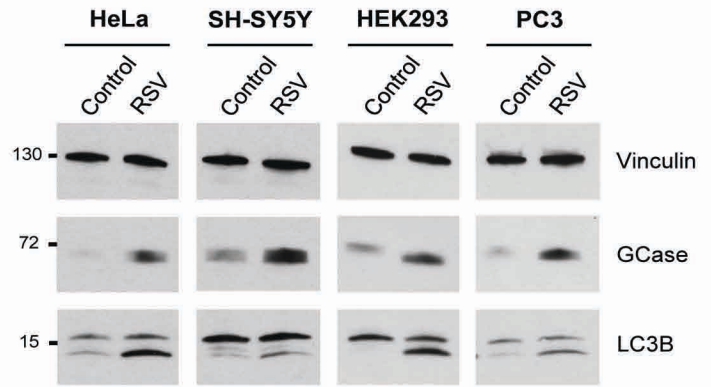

c

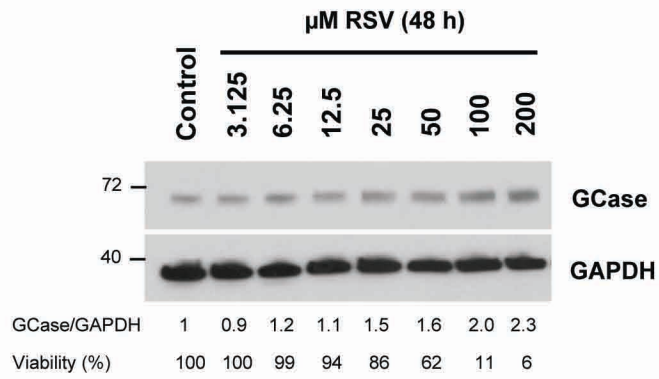

d

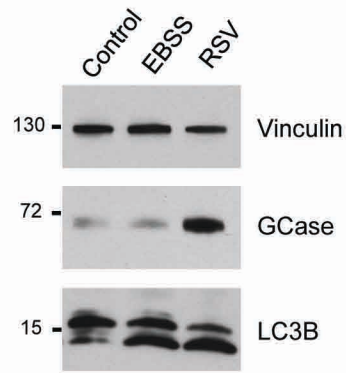

e

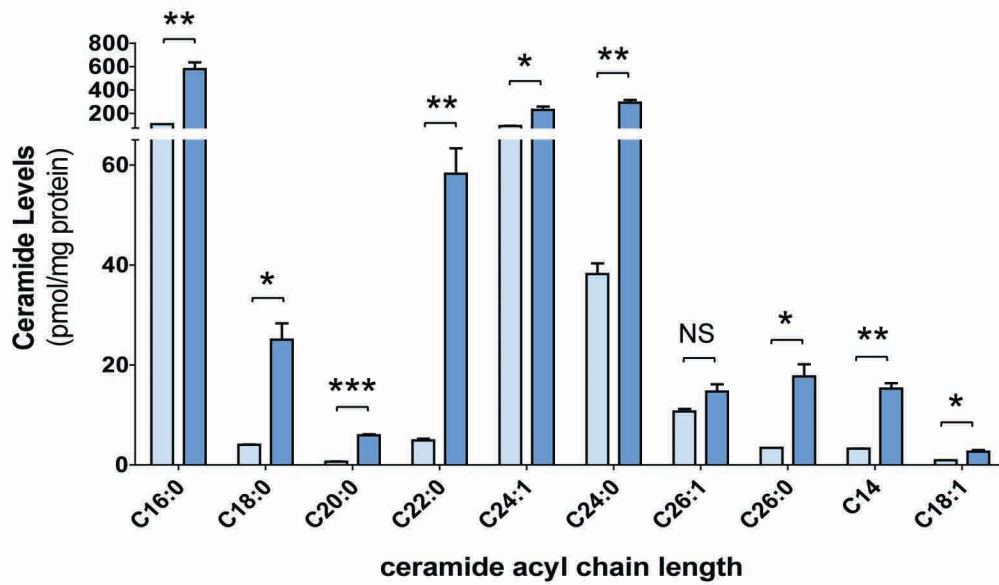

f

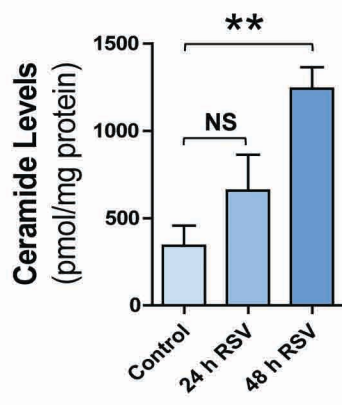

g

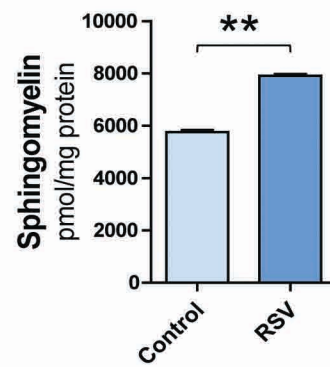

Supplement: cdd201780x6.pdf [file cdd201780x6.pdf]
